# Supplementary material for: Curing of Cellulose Hydrogels by UV Radiation for Mechanical Reinforcement
Source: MDPI journal article supplement (doi:10.3390/polym13142342), 2021-07-17
Supplement: s1 [file s1]

# **Curing of cellulose hydrogels by UV radiation for mechanical reinforcement**

**Rodybeth Cruz-Medina<sup>1</sup>, Daniel A. Ayala-Hernández<sup>1</sup>, Alejandro Vega-Rios<sup>1</sup>, Erika I. López-Martínez<sup>1</sup>, Mónica E. Mendoza-Duarte<sup>1</sup>, Anayansi Estrada-Monje<sup>2</sup> and E. Armando Zaragoza-Contreras<sup>1,\*</sup>**

<sup>1</sup> Department of Engineering and Materials Chemistry, Centro de Investigación en Materiales Avanzados, SC, Miguel de Cervantes No. 120, Complejo de Industrial Chihuahua, Chihuahua, Chih. CP 31136.

<sup>2</sup> Centro de Innovación Aplicada en Tecnologías Competitivas, AC, Calle Omega No. 201, Industrial Delta, León, Guanajuato. CP 37545.

\* Correspondence: [armando.zaragoza@cimav.edu.mx](mailto:armando.zaragoza@cimav.edu.mx); Tel.: (+52 614 4394811)

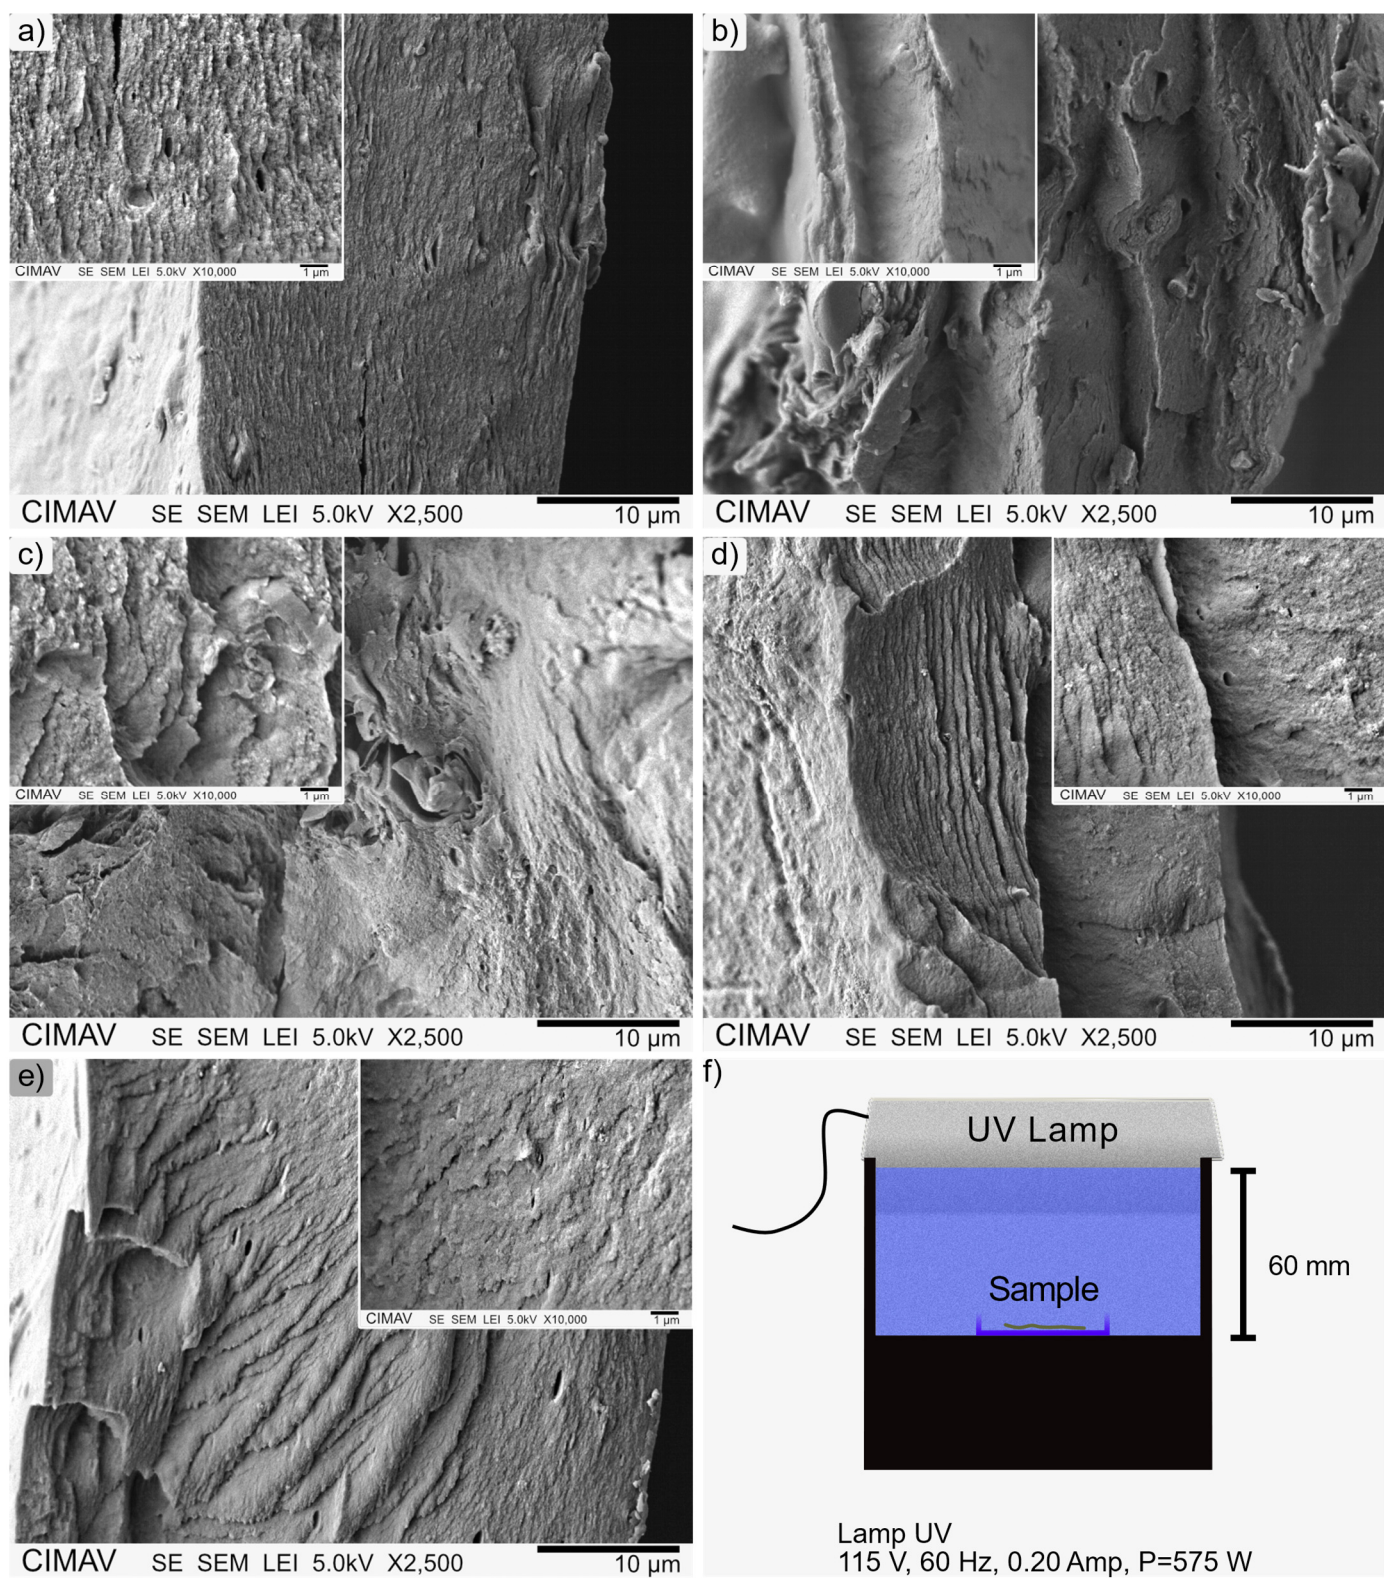

**Figure S1.** FESEM Micrographs and reactor diagram for cellulose curing. (a) 0 min; (b) 5min; (c) 10 min; (d) 15 min; (e) 20 min; and (f) reactor consisting of a UV lamp, camera obscura and sample holder.
